# Supplementary material for: The Notch-mediated hyperplasia circuitry in Drosophila reveals a Src-JNK signaling axis
Source: eLife journal article supplement (doi:10.7554/elife.05996), 2015-07-28
Supplement: figures [file elife-05996-figures-v1.pdf]

---

## Figures and figure supplements

The Notch-mediated hyperplasia circuitry in *Drosophila* reveals a Src-JNK signaling axis

**Diana M Ho, et al.**

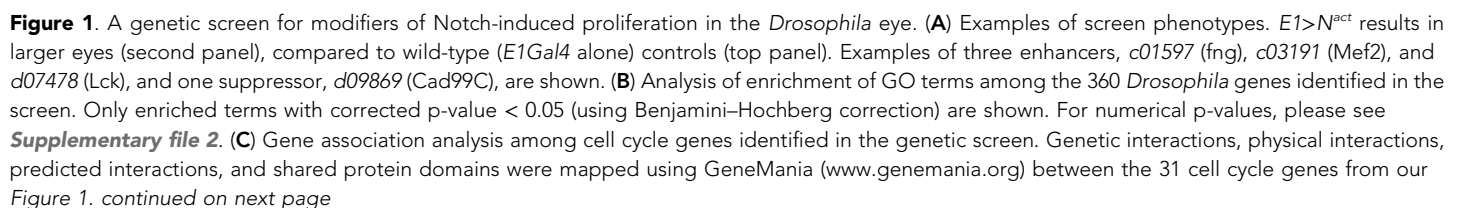

Figure 1. Continued

screen (black circles) and Notch (yellow). Genes labeled with grey circles are part of the network but were not identified in our screen.

DOI: [10.7554/eLife.05996.003](https://doi.org/10.7554/eLife.05996.003)

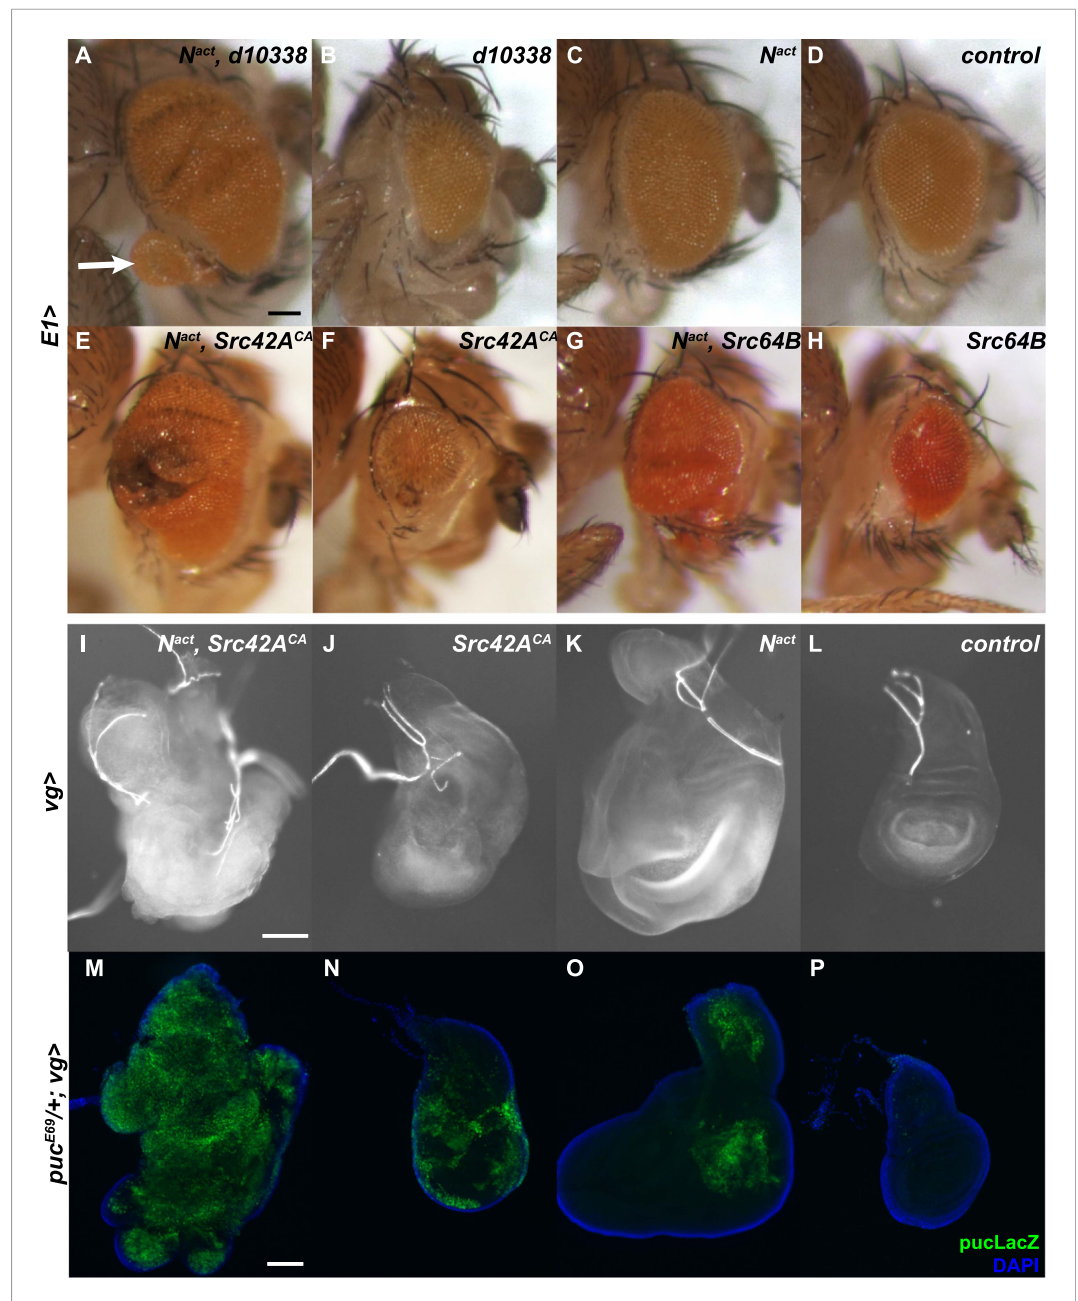

**Figure 2.** Synergy between Notch and Src in the eye and wing causes hyperplastic phenotypes and activates JNK. (A–H) Various UAS-Src constructs were driven by *E1Gal4* along with UAS-*N<sup>act</sup>* in the developing eye. When *d10338*, an Exelixis allele that causes Gal4-dependent overexpression of Src42A, and *N<sup>act</sup>* are coexpressed (A), the *N<sup>act</sup>* large eye phenotype (C) is enhanced; in addition, occasional outgrowths of eye tissue can be seen (arrow). Note that *d10338* alone (B) results in decreased eye size, whereas *N<sup>act</sup>* alone (C) results in increased eye size compared to the control (D). Src42A<sup>CA</sup> and Src64B both cause a similar phenotype (E, G) when coexpressed with *N<sup>act</sup>* under *E1Gal4*, and both also result in decreased eye size in the absence of *N<sup>act</sup>* (F, H). (I–L) UAS-*N<sup>act</sup>* and UAS-Src42A<sup>CA</sup> were driven in the developing wing using the *vgGal4* driver. When *N<sup>act</sup>* and Src42A<sup>CA</sup> are co-expressed (I), wing discs are overgrown compared to either Src42A<sup>CA</sup> (J) or *N<sup>act</sup>* (K) alone and display a characteristic ‘crumpled ball’ phenotype indicative of tissue disorganization and cell migration. Note that Src42A<sup>CA</sup> alone (J) causes disorganization but not overgrowth. (M–P) *Puc-LacZ* reporter assay for JNK signal activation in wing discs expressing UAS constructs as indicated under the *vgGal4* driver in a *puc<sup>E69</sup>/+* background. Coexpression of *N<sup>act</sup>* and Src42A<sup>CA</sup> (M) causes strong, global activation of the *pucLacZ* reporter. In contrast, expression of either gene alone (N, O) causes weaker activation that is limited in scope. Scale bars: 100 μm.

DOI: [10.7554/eLife.05996.004](https://doi.org/10.7554/eLife.05996.004)

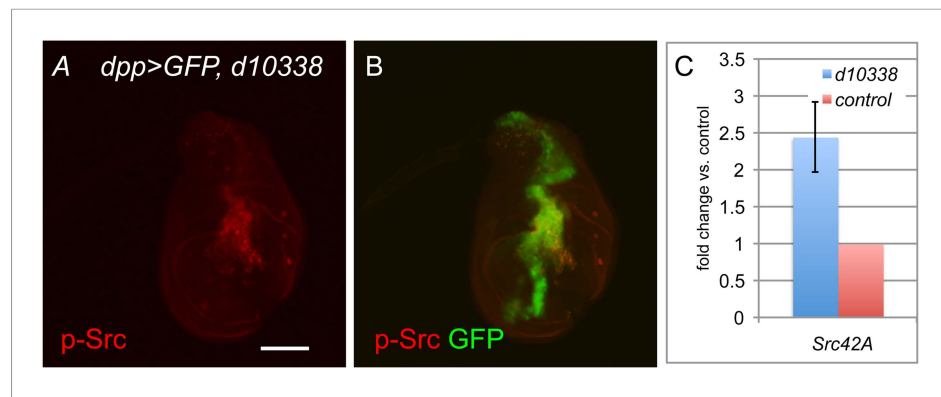

**Figure 2—figure supplement 1.** *d10338* is a UAS allele of *Src42A*. (A, B) UAS-GFP/*d10338*; *dppGal4/+* wing discs were stained for anti-phosphoY418-Src (p-Src, red), which labels activated Src. Scale bar: 100  $\mu$ m. (C) qPCR for *Src42A* in *MS1096Gal4/+; d10338/+* wing discs (blue bar) or *MS1096Gal4/+* controls (red bar). Mean values are shown for two independent biological replicates.

DOI: [10.7554/eLife.05996.005](https://doi.org/10.7554/eLife.05996.005)

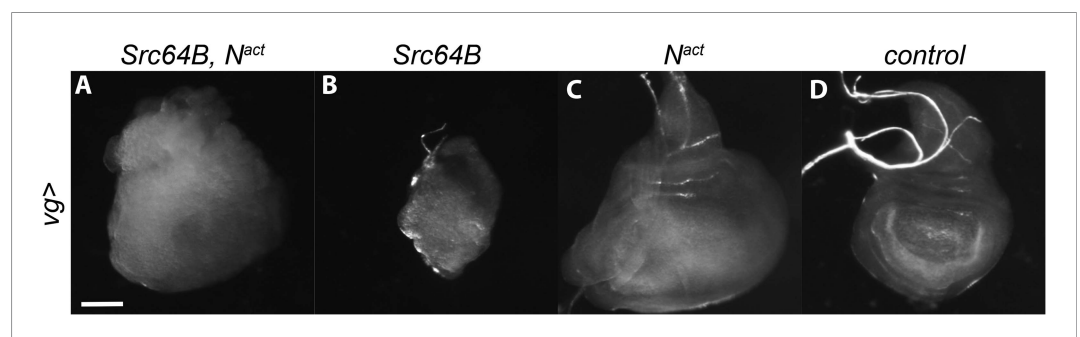

**Figure 2—figure supplement 2.** *Src64B* also synergizes with *N<sup>act</sup>* in the wing disc. When driven with *vgGal4*, *Src64B* and *N<sup>act</sup>* synergize to produce an overgrown, disorganized disc (A), whereas *Src64B* alone causes disorganization (B) and *N<sup>act</sup>* alone causes large but organized discs (C) compared to control (D). Scale bar: 100  $\mu$ m.

DOI: [10.7554/eLife.05996.006](https://doi.org/10.7554/eLife.05996.006)

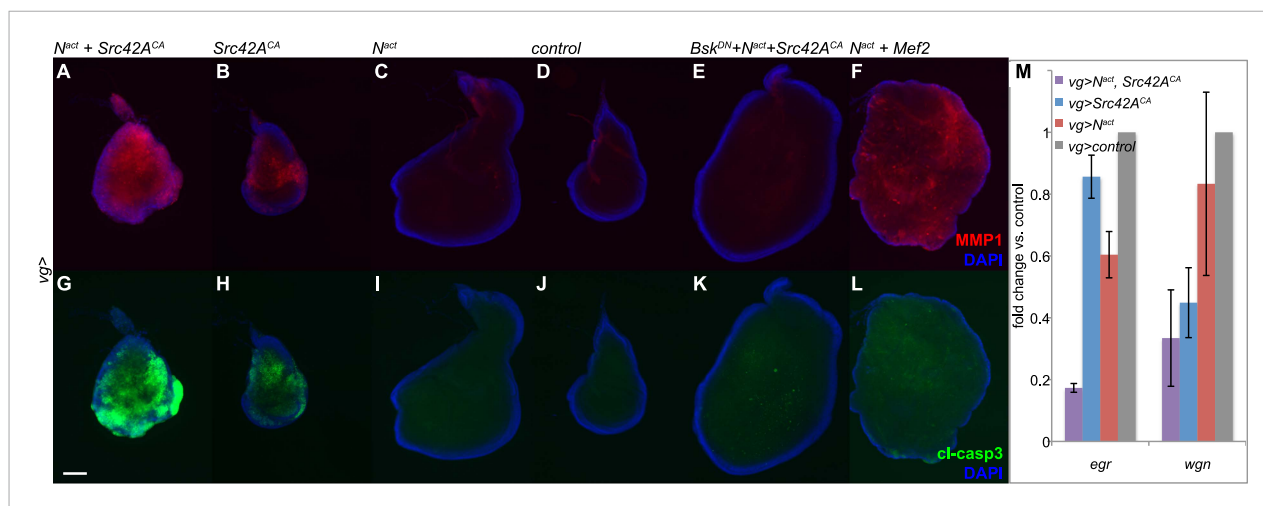

**Figure 3.** N/Src synergy induces both MMP1 and apoptosis. (A–L) Immunofluorescence for MMP1 (A–F) and cleaved caspase 3 (cl-casp3, G–L) in wing discs expressing UAS constructs under *vgGal4*. Together, *N<sup>act</sup>* and *Src42A<sup>CA</sup>* cause robust activation of both MMP1 (A) and cl-casp3 (G), which is strongly reduced by *Bsk<sup>DN</sup>* (E, K). The combination of *N<sup>act</sup>* and *Mef2* results in an increase in MMP1 (F) but little effect on cc3 (L). (M) qPCR for *egr* and *wgn* in wing discs overexpressing genes as indicated under the *vgGal4* driver reveals that both transcripts are strongly downregulated when *N<sup>act</sup>* and *Src42A<sup>CA</sup>* are coexpressed. Scale bar: 100  $\mu$ m.

DOI: [10.7554/eLife.05996.007](https://doi.org/10.7554/eLife.05996.007)

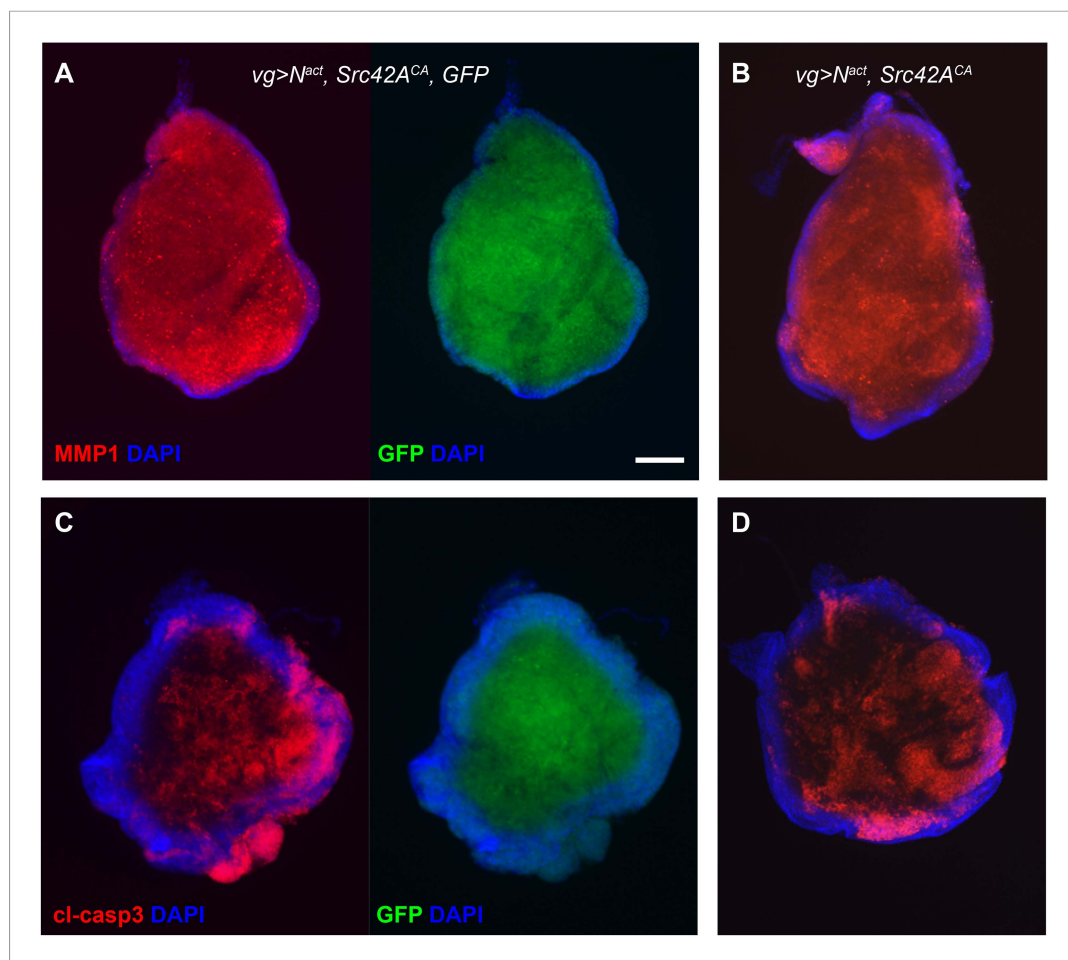

**Figure 3—figure supplement 1.** Gal4/UAS titration does not affect the N/Src phenotype. (A, C) One copy each of *UAS-N<sup>act</sup>*, *UAS-Src42A<sup>CA</sup>*, and *UAS-GFP* (three UAS transgenes total) were driven with *vgGal4* in the wing disc, and compared to (B, D) wing discs expressing only *UAS-N<sup>act</sup>* and *UAS-Src42A<sup>CA</sup>* (two UAS transgenes total) with *vgGal4*. Discs were stained for MMP1 (A, B) or cleaved caspase 3 (C, D). Scale bar: 100 μm.

DOI: [10.7554/eLife.05996.008](https://doi.org/10.7554/eLife.05996.008)

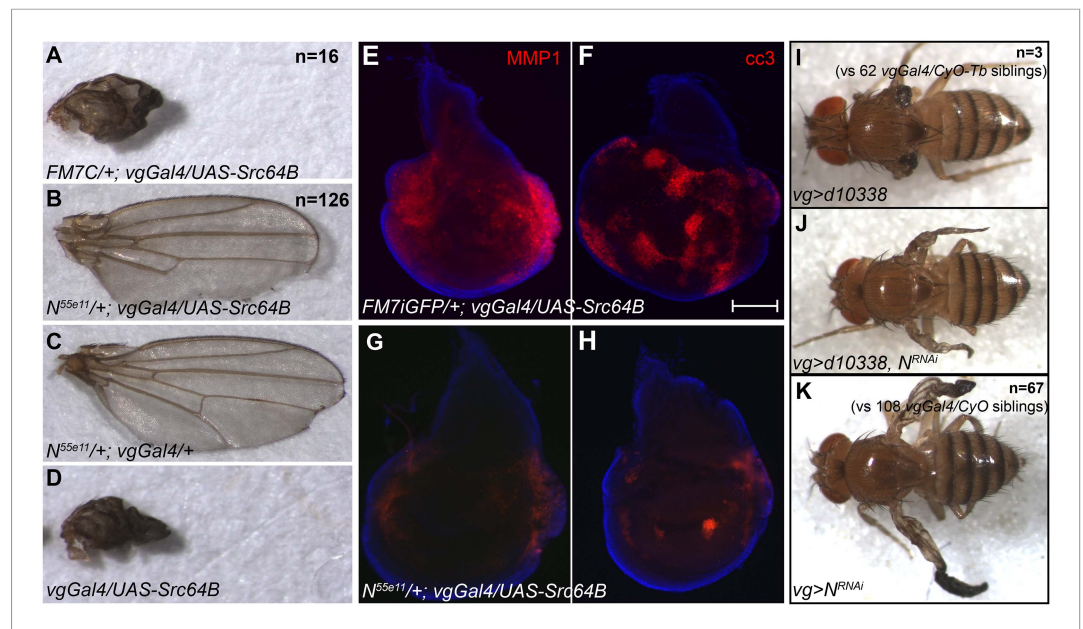

**Figure 3—figure supplement 2.** A heterozygous null mutation of Notch can rescue lethality and phenotype of Src alone.  $N^{55e11}/FM7C;UAS-Src64B$  virgins were crossed to  $vgGal4$  males at 18°C (A, B) and the resultant female progeny were scored.  $N^{55e11}/+;vgGal4/UAS-Src64B$  flies were more viable (B,  $n = 126$  over four independent experiments) than their  $FM7C/+;vgGal4/UAS-Src64B$  siblings (A,  $n = 16$ ), and show a rescued phenotype similar to that of  $N^{55e11}/+;vgGal4/+$  controls (C).  $FM7C/+;vgGal4/UAS-Src64B$  (A) wings were indistinguishable from  $vgGal4/UAS-Src64B$  (D) wings. (E–H) Immunostaining for MMP1 (E, G) or cleaved caspase 3 (F, H) in wing discs with genotypes (D, E)  $FM7iGFP/+;vgGal4/UAS-Src64B$  or (F, G)  $N^{55e11}/+;vgGal4/UAS-Src64B$ . Scale bar: 100  $\mu m$ . (I–K)  $d10338$  (Exelixis  $Src42A$  allele) lethality and phenotype at 25°C can be partially rescued by Notch RNAi.  $vgGal4/d10338$  flies (I) are largely pupal lethal ( $n = 3$  viable adults compared to 62  $vgGal4/CyO-Tb$  siblings from the same cross) and the few escapers have no wings. In contrast,  $vgGal4/d10338, UAS-N^{RNAi}$  flies (J) have narrow, short, and shriveled wings and much lower lethality ( $n = 67$ , compared to 108  $vgGal4/CyO$  siblings from the same cross.) The wing phenotype appears to be a more severe version of the phenotype of  $vgGal4/UAS-N^{RNAi}$  flies (K).

DOI: [10.7554/eLife.05996.009](https://doi.org/10.7554/eLife.05996.009)

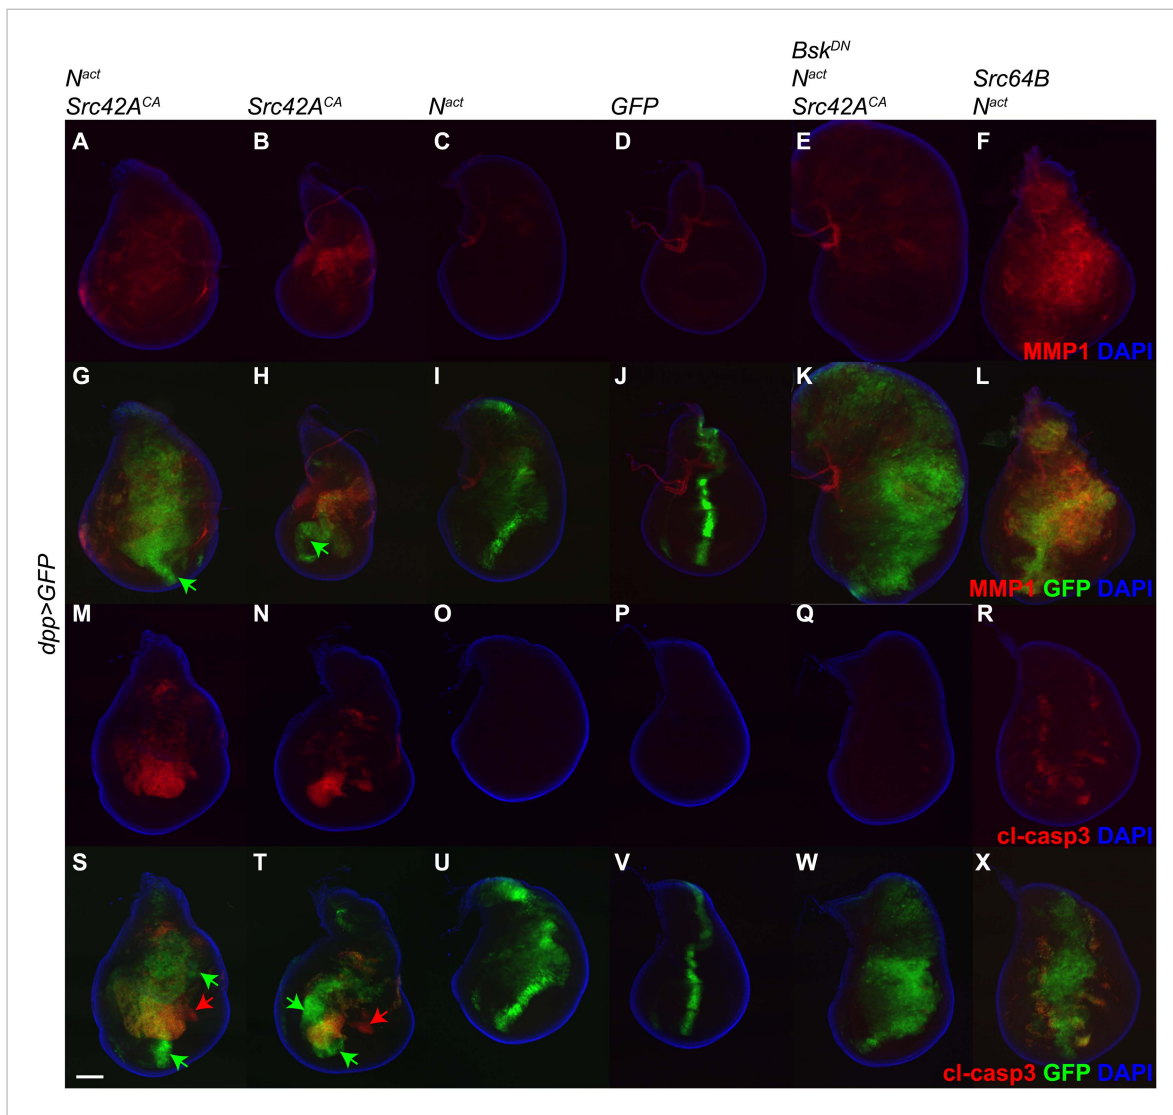

**Figure 4.** *dpp-Gal4* driven expression of *N<sup>act</sup>* and *Src42A<sup>CA</sup>* also upregulates MMP1 and induces apoptosis. UAS transgenes as indicated were driven with *dppGal4* along with *UAS-GFP* at 18°C. Controls express an extra copy of *UAS-GFP*. Wing discs were stained with anti-MMP1 (A–L) or anti-cleaved caspase 3 (cl-casp3, M–X). The combination of *N<sup>act</sup>* and *Src42A<sup>CA</sup>* induces both MMP1 (A, G) and cl-casp3 (M, S), and *Src42A<sup>CA</sup>* alone does the same to a lesser extent (B, H, N, T). Green arrows: GFP positive cells that do not express MMP1 (G, H) or cl-casp3 (S, T). Red arrows: cl-casp3-positive cells that do not express GFP, indicating a potentially non-cell-autonomous effect. This effect can be largely rescued with *Bsk<sup>DN</sup>* (E, K, Q, W). Similarly, the combination of *Src64B* and *N<sup>act</sup>* also induces both MMP1 (F, L) and cl-casp3 (R, X). Scale bar: 100 μM.

DOI: [10.7554/eLife.05996.010](https://doi.org/10.7554/eLife.05996.010)

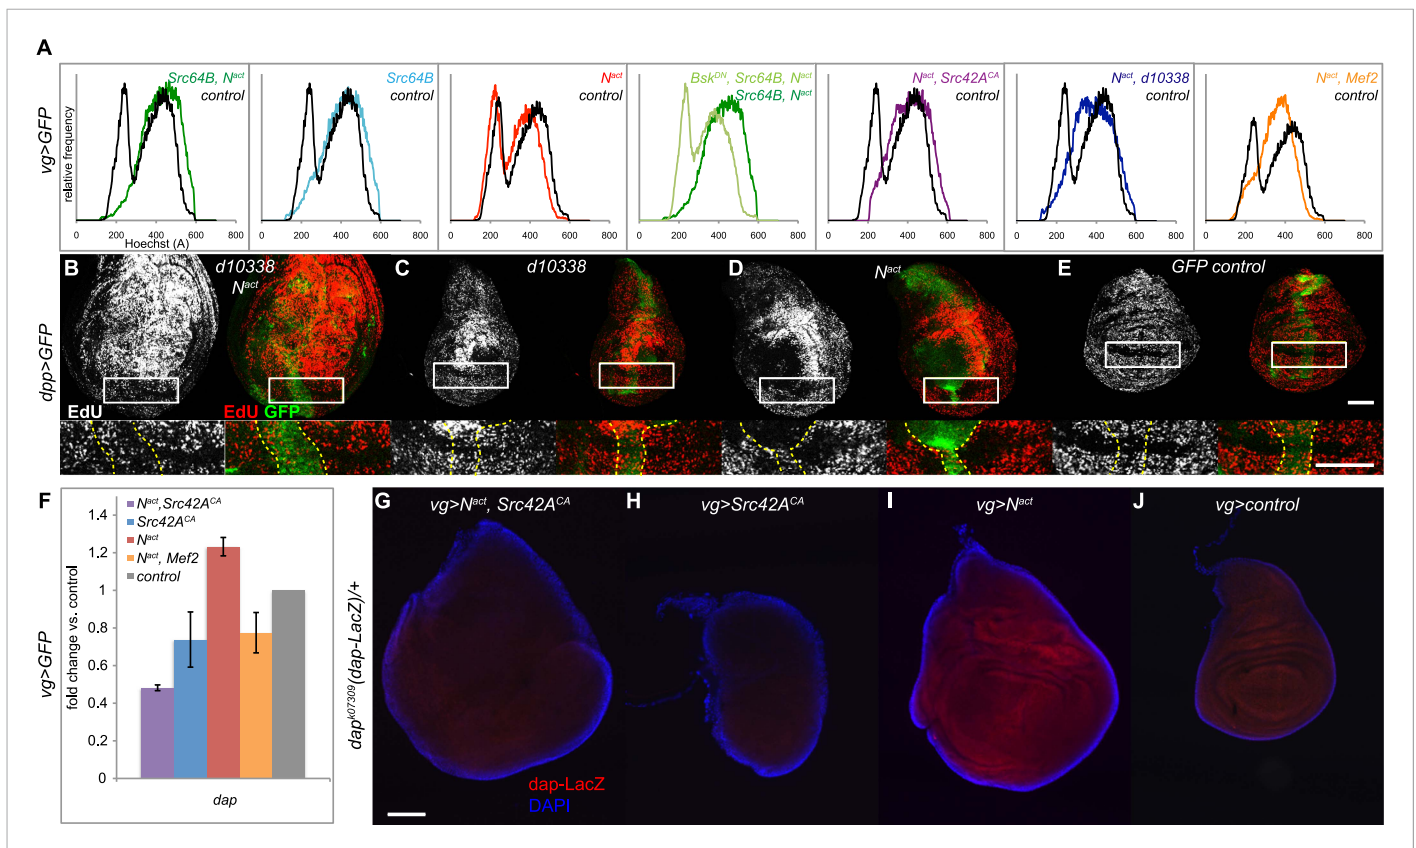

**Figure 5.** N/Src synergy disrupts the cell cycle. **(A)** DNA content analysis was performed on Hoechst-labeled dissociated cells from *vgGal4;UAS-GFP* wing discs expressing *UAS-Src64B;UAS-N<sup>act</sup>* (dark green trace), *UAS-Src64B* (light blue), *UAS-N<sup>act</sup>* (red), WT control (black), *UAS-Bsk<sup>DN</sup>;UAS-Src64B;UAS-N<sup>act</sup>* (light green), *UAS-N<sup>act</sup>;UAS-Src42A<sup>CA</sup>* (purple), *UAS-N<sup>act</sup>;d10338* (dark blue) or *UAS-N<sup>act</sup>;UAS-Mef2* (orange). Comparative histograms show relative frequencies on the y-axis, normalized to total number of counts for each sample. **(B–E)** EdU incorporation assay in *dppGal4;UAS-GFP* wing discs expressing *d10338;UAS-N<sup>act</sup>* **(B)**, *d10338* **(C)**, *UAS-N<sup>act</sup>* **(D)**, or *UAS-GFP* **(E)** at 22°C. A closeup of the areas denoted by boxes is shown below each image, and the GFP-positive area is marked with dotted yellow lines. Whereas *UAS-N<sup>act</sup>* alone expands the ZNC (zone of non-proliferating cells) and also non-cell-autonomously induces proliferation in the dorsal-posterior region of the disc, thus increasing the size of the dorsal compartment **(D)**, the combination of *d10338* and *UAS-N<sup>act</sup>* eliminates the expansion of the non-proliferative zone and causes cells within the ZNC proper to begin incorporating EdU; furthermore, the area of increased proliferation in the dorsal compartment appears to be expanded **(B)**. **(F–J)** *N<sup>act</sup>* and *Src42A<sup>CA</sup>* together cause a reduction in *dacapo* (*dap*) levels. **(F)** qPCR for *dap* expression in wing discs expressing *N<sup>act</sup>* and/or *Src42A<sup>CA</sup>* or *Mef2* under the *vgGal4* driver. **(G–J)** A *dap-LacZ* reporter assay was used to visualize *dap* expression in *vgGal4* wing discs in a *dap<sup>k07309</sup>/+* background. Both *N<sup>act</sup>* and *Src42A<sup>CA</sup>* together **(G)** and *Src42A<sup>CA</sup>* alone **(H)** show a reduction in *dap-LacZ* compared to both *N<sup>act</sup>* alone **(I)** and *vgGal4* controls **(J)**. Scale bars: 100  $\mu$ M.

DOI: 10.7554/eLife.05996.011

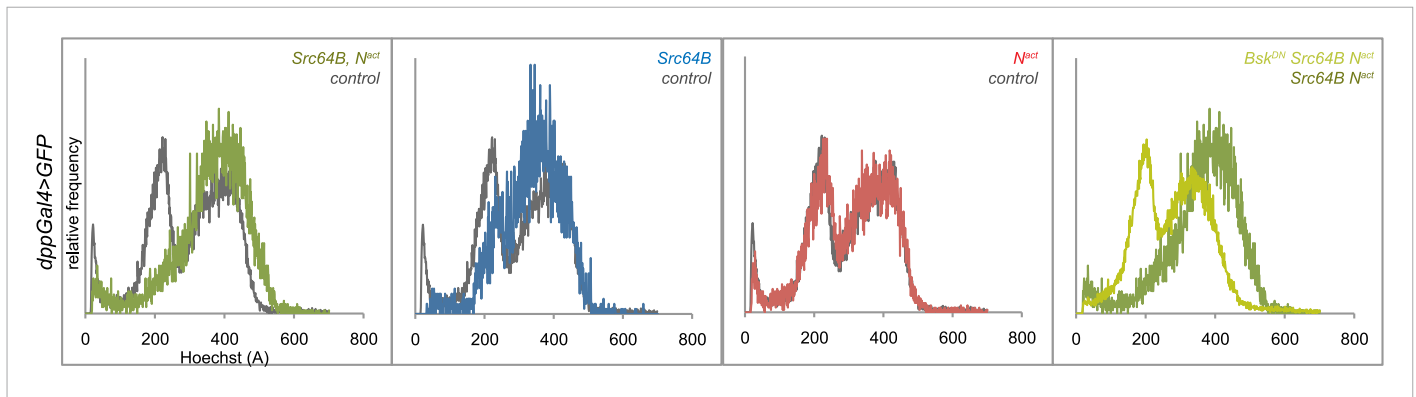

**Figure 5—figure supplement 1.** Elimination of G1 phase of the cell cycle also occurs in *dppGal4* wing discs expressing *N<sup>act</sup>* and *Src64B*. DNA content analysis was performed on Hoechst-labeled dissociated cells from *dppGal4*;UAS-GFP wing discs expressing UAS-*Src64B*;UAS-*N<sup>act</sup>* (green trace), UAS-*Src64B* (blue), UAS-*N<sup>act</sup>* (red), WT control (grey), or UAS-*Bsk<sup>DN</sup>*;UAS-*Src64B*;UAS-*N<sup>act</sup>* (yellow-green). Comparative histograms show relative frequencies on the y-axis, normalized to total number of counts for each sample.

DOI: 10.7554/eLife.05996.012

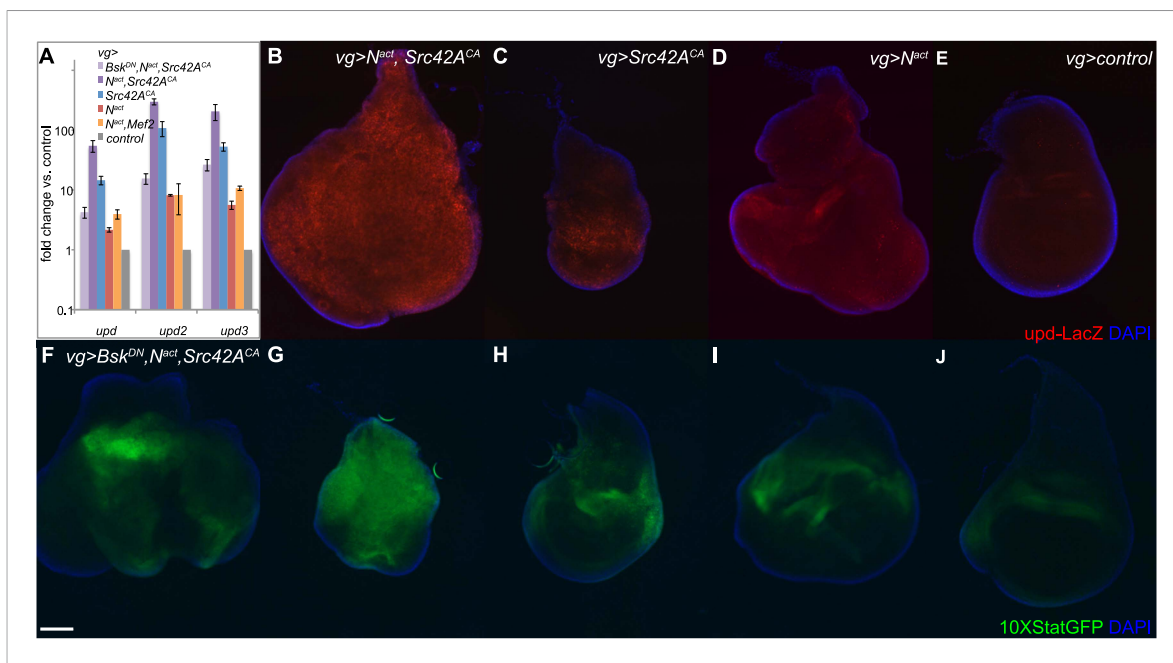

**Figure 6.** N/Src synergy activates the JAK/STAT signaling pathway. (A) qPCR for *unpaired* family ligands in *vgGal4* discs expressing UAS constructs as indicated. All three *upd* family genes are highly upregulated by the combination of *N<sup>act</sup>* and *Src42A<sup>CA</sup>* (dark purple bars), and this upregulation is dependent upon JNK signaling as *Bsk<sup>DN</sup>* rescues it (lavender bars). Coexpression of *N<sup>act</sup>* and *Mef2* (orange bars) induces a much lower level of the *upd* ligands. Note that the y-axis is on a logarithmic scale. (B–E) An *upd-LacZ* reporter assay in *vgGal4* wing discs validates the qPCR data and demonstrates that *N<sup>act</sup>*+*Src42A<sup>CA</sup>* causes strong, widespread activation of *upd* transcription (B); in contrast, either gene alone (C, D) causes lower, more restricted levels of *upd* upregulation. (F–J) The *10XStatGFP* reporter was used to assess JAK/STAT signal activation in *vgGal4* discs grown at 18°C. *N<sup>act</sup>*+*Src42A<sup>CA</sup>* strongly upregulates *10XStatGFP* (G), whereas either gene alone (H, I) only weakly upregulates the reporter. The addition of *Bsk<sup>DN</sup>* (F) reduces the *10XStatGFP* induced by *N<sup>act</sup>*+*Src42A<sup>CA</sup>* (G) to levels similar to those of *N<sup>act</sup>* alone (I). Note that since the *upd-LacZ* discs were grown at 25°C and the *10XStatGFP* discs were grown at 18°C, the latter displays a somewhat weaker phenotype, hence the difference in disc size between B/D and G/I. Scale bar: 100 μm.

DOI: 10.7554/eLife.05996.013

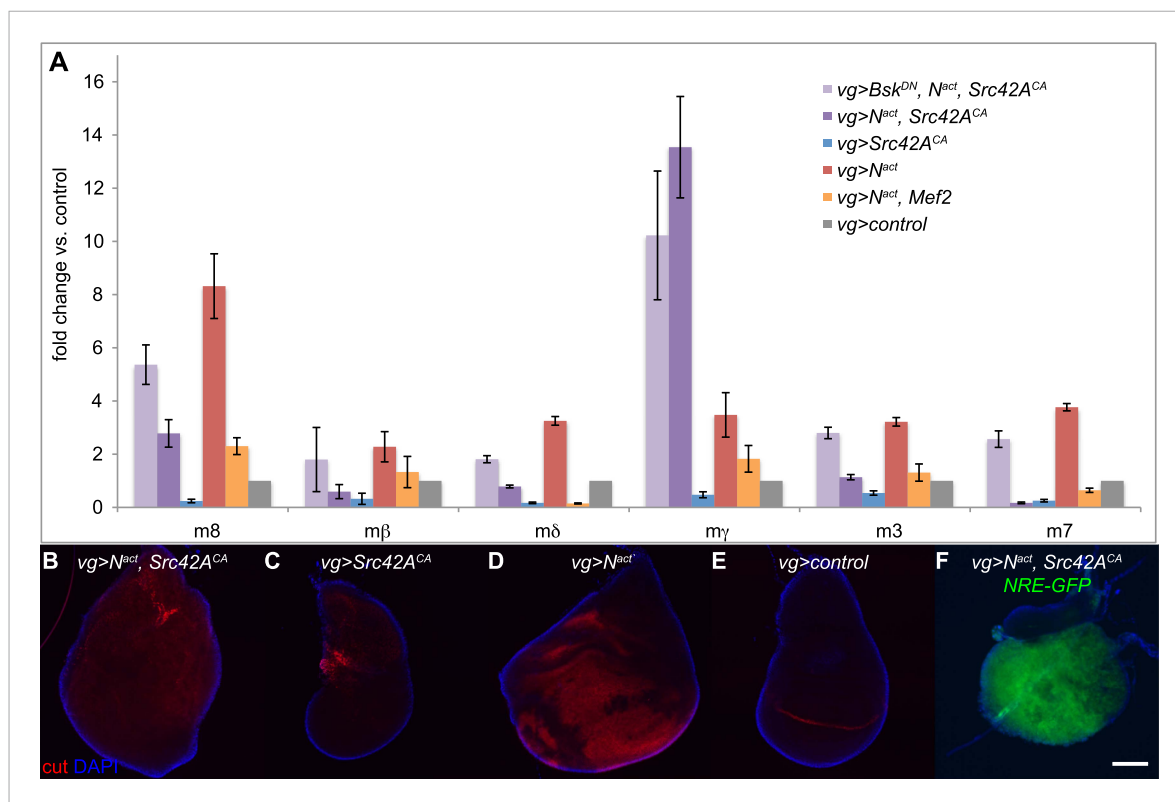

**Figure 7.** Notch targets are differentially affected by N/Src synergy. **(A)** qPCR assay for expression levels of *E(spl)* complex members in *vgGal4* wing discs expressing UAS constructs as indicated. **(B–E)** Immunostaining with anti-cut (red) in *vgGal4* wing discs. *N<sup>act</sup>* alone **(D)** induces cut expression, which is suppressed in *N<sup>act</sup>+Src42A<sup>CA</sup>* discs **(B)**. Note that both ectopic and endogenous cut appear to be suppressed. **(F)** NRE-GFP expression in wing discs expressing *N<sup>act</sup>+Src42A<sup>CA</sup>* under *vgGal4*. Scale bar: 100  $\mu$ m.

DOI: 10.7554/eLife.05996.014

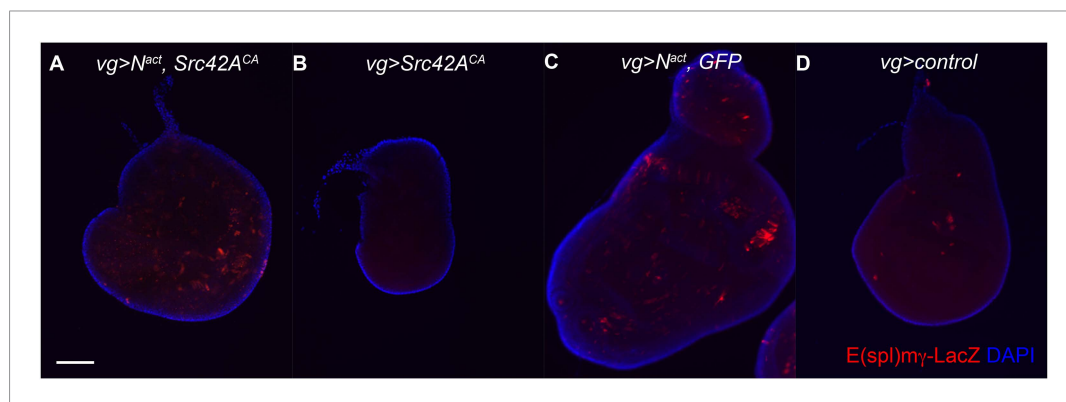

**Figure 7—figure supplement 1.** *E(spl)my* reporter staining in N/Src wing discs. *VgGal4* wing discs expressing UAS-*N<sup>act</sup>* and/or UAS-*Src42A<sup>CA</sup>* in an *E(spl)my-LacZ/+* background were stained for anti- $\beta$ -gal. *E(spl)my-LacZ* consists of the 234-bp *my* enhancer region fused to a LacZ reporter (Nellesen et al., 1999). Note that *E(spl)my* induced by *N<sup>act</sup>* **(C)** is not suppressed by the addition of *Src42A<sup>CA</sup>* **(A)**. *Src42A<sup>CA</sup>* alone **(B)** seems to suppress the endogenous *E(spl)my* staining **(D)** in the proneural cells.

DOI: 10.7554/eLife.05996.015

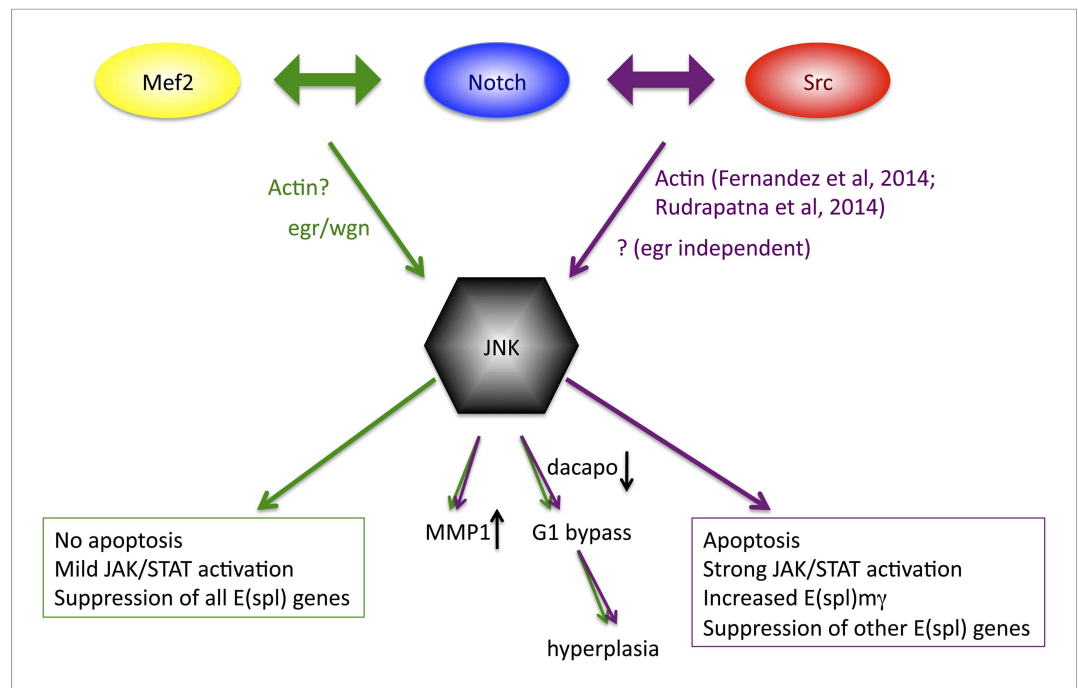

**Figure 8.** Model of convergence and divergence of the Notch/Mef2/JNK and Notch/Src/JNK signaling axes. N/Mef2 and N/Src synergies converge on JNK, through *eiger*-dependent and *eiger*-independent means respectively. Some downstream processes are common to both synergies, such as MMP1 activation and bypass of G1 phase of the cell cycle via *dap* downregulation. Other downstream outputs, such as apoptosis, level of JAK/STAT activation, and regulation of Notch target genes, diverge between N/Src and N/Mef2 synergy.

DOI: [10.7554/eLife.05996.016](https://doi.org/10.7554/eLife.05996.016)
